# Supplementary material for: Mixing state of oxalic acid containing particles in the rural area of Pearl River Delta, China: implication for seasonal formation mechanism of Secondary Organic Aerosol (SOA)
Source: Copernicus journal article supplement (doi:10.5194/acp-2016-1081), 2016-12-21
Supplement: Supplementary file [file acp-2016-1081-AC3-supplement.pdf]

### **Response to the comments of Anonymous Referee #3**

[Atmospheric Chemistry and Physics, MS ID: acp-2016-1081]

Title: Mixing state of oxalic acid containing particles in the rural area of Pearl River Delta, China: implication for seasonal formation mechanism of Secondary Organic Aerosol (SOA)

#### **General comments:**

The authors present results measurements of ambient aerosol during two periods (summer vs winter) in the Pearl River Delta. Most of the discussion focuses on oxalate loadings and its mixing state. Based on correlations with metal-containing particles, the authors conclude that iron has an important role in OH formation and therefore in oxalate formation. While generally the manuscript is well written, the discussion of the chemical mechanism is very weak and hand waving. Without running a detailed multiphase model, such conclusions cannot be drawn with certainty. Therefore, I suggest removing the discussion of the role of iron and the chemical mechanism in general. After my additional comments below are addressed, the manuscript may be suitable for publication.

**Response:** Thank you for your comments and suggests. The substantial internal mixing of oxalic acid with sulfate and nitrate in summer reflects the secondary nature of oxalic acid particles. Together with the abundant heavy metal type oxalic acid particles, it suggests a strong connection between the production of some oxalic acid and the participation of transition metals like iron and copper. The photochemical formation process of oxalic acid in summer is proposed to explain the obvious photochemical diurnal pattern of HM type oxalic acid particles. Indeed, it would be more convincing if we run the multiphase model to compare the results of proposed explanation and the observation in the field measurements. However, we are not equipped to run such model simulations. Thus, we have toned down about the discussions of the production of oxalic acid in HM type particles as a plausible explanation instead of a proposed formation mechanism.

We have answered all your comments and questions through point by point response to illustrate the photochemical formation process of oxalic acid in this work. We appreciate these valuable and helpful comments to our work and enable it to meet the high quality of the journal Atmos. Chem. Phys. Our responses to all the comments are itemized below.

Anything about our paper, please feel free to contact me at [limei2007@163.com](mailto:limei2007@163.com)

Best regards!

Sincerely yours

Mei Li

April 6, 2017

## Specific comments and point by point responses:

### Major comments

1. The suggested chemical mechanism is oversimplified and contains several misconceptions and/or omissions:

a) Generally, it is assumed that direct OH uptake is the main source of OH in the aqueous phase [e.g., Ervens et al., 2003; Herrmann, 2003; Tilgner et al., 2013]. Therefore higher OH (gas) concentration will lead to higher OH concentration in the aqueous phase. Higher OH (aq) concentration will also lead to more oxidation of oxalate and therefore less SOA.

**Response:** We thank the reviewer's comments. The main sources of •OH in the aqueous phase contain both direct uptake from the gas phase and chemical sources in the aqueous phase such as Fenton reactions and photolysis of H<sub>2</sub>O<sub>2</sub> and nitrate (Ervens et al., 2014; Ervens, 2015; Gligorovski et al., 2015; Herrmann et al., 2015). Although the concentrations of H<sub>2</sub>O<sub>2</sub> and •OH in gas and aqueous phases are not available in this work, considering much higher Henry's law constant of H<sub>2</sub>O<sub>2</sub> ( $K_H=8.3\times 10^4 \text{ M atm}^{-1}$ ) than •OH ( $K_H=30 \text{ M atm}^{-1}$ ) (Hanson et al., 1992; O'Sullivan et al., 1996) and abundant fraction of transition metals in the oxalic acid particles in this work, aqueous phase chemistry likely contributes substantially to the source of •OH in the aqueous phase according to high efficiency of •OH production from Fenton type reactions (Gligorovski et al., 2015). The aqueous phase oxidation of glyoxal and methylglyoxal is the main source of oxalic acid production, and their reaction rates with •OH ( $1.1\times 10^9 \text{ mole}^{-1} \text{ s}^{-1}$ ) is one order of magnitude higher than oxalic acid with •OH ( $1.9\times 10^8 \text{ mole}^{-1} \text{ s}^{-1}$ ) as previously reported (Herrmann, 2003; Myriokefalitakis et al., 2011). Thus, the high •OH (aq) concentration would lead to the enrichment of oxalic acid in aqueous phase.

In order to clarify these points, we have changed “While the partition of •OH from gas to aqueous phase is limited by its low Henry's law constant ( $K_{H,OH}=30 \text{ M atm}^{-1}$ ) and short lifetime of •OH in the gas phase (Hanson et al., 1992), the main sources of aqueous •OH are from the photolysis of H<sub>2</sub>O<sub>2</sub>, NO<sub>3</sub><sup>-</sup>, NO<sub>2</sub><sup>-</sup>, and chromophoric dissolved organic matter (CDOM) (Yu et al., 2014; Badali et al., 2015; Gligorovski et al., 2015; Tong et al., 2016). Among these sources the photolysis of H<sub>2</sub>O<sub>2</sub> through Fenton reactions involving the catalysis of transition metal ions like Fe<sup>2+/3+</sup>, Cu<sup>+2+</sup> and Mn<sup>2+/3+</sup> is an efficient source of •OH (Deguillaume et al., 2005; Herrmann et al., 2005; Ervens et al., 2014).” to “The main sources of •OH in the aqueous phase contain both direct uptake from the gas phase and the chemical sources in the aqueous phase such as Fenton type reactions and photolysis of H<sub>2</sub>O<sub>2</sub>, NO<sub>3</sub><sup>-</sup>, NO<sub>2</sub><sup>-</sup>, and chromophoric dissolved organic matter (CDOM) (Yu et al., 2014; Badali et al., 2015; Ervens, 2015; Gligorovski et al., 2015; Herrmann et al., 2015; Tong et al., 2016). Considering the low Henry's law constant of •OH ( $K_{H,OH}=30 \text{ M atm}^{-1}$ ) (Hanson et al., 1992) and abundant fraction of transition metal ions in the oxalic acid particles, the photolysis of H<sub>2</sub>O<sub>2</sub> through Fenton reactions involving the catalysis of transition metal ions like Fe<sup>2+/3+</sup>, Cu<sup>+2+</sup> and Mn<sup>2+/3+</sup> likely contributes substantially to the source of •OH in the aqueous phase in this work (Deguillaume et al., 2005; Herrmann et al., 2005; Ervens et al., 2014).” in lines 345-355.

b) Higher iron concentration might lead to more OH. However, more importantly is the effect of the loss of oxalate due to the photolysis of the iron-oxalato complex. While this reaction is mentioned in the manuscript, its predominating role in oxalate loss [Sorooshian et al., 2013] is not discussed in a balanced way.

**Response:** The degradation of oxalic acid from the complex with iron has been discussed in the manuscript to explain the diurnal change of oxalic acid particles. Indeed, it would be more specific to evaluate the net production of oxalic acid from photochemical process if we could calculate the production and loss of oxalic acid. Unfortunately, we have no real time data about the ambient concentrations of oxalic acid and iron, so the exact amount of oxalic acid loss from the photolysis of the iron complexes cannot be obtained for now.

c) At low pH, it can be expected that reaction rates are lower since in general the undissociated acids (glyoxylic, glycolic) react more slowly than their dissociated counterparts. Oxalate has a very low pKa (1.23) so that even at low pH a substantial fraction is still present as oxalate. Could changes in pH and therefore reaction rates explain some of the temporal trends?

**Response:** Indeed, the reaction rate of glyoxylate with  $\bullet\text{OH}$  ( $k=2.8\times 10^9$  mole<sup>-1</sup> s<sup>-1</sup>, pH=8) is one order of magnitude higher than glyoxylic acid ( $k=3.6\times 10^8$  mole<sup>-1</sup> s<sup>-1</sup>, pH=1), so the aqueous phase with high pH value is more favorable for the production of oxalic acid from the oxidation of precursors. The SPAMS can only detect the ion peak of oxalate ion (m/z -89) in single particles, so the percentage of oxalate in total oxalic acid cannot tell from the data of SPAMS. We believe the diurnal change of pH also has influence on the oxidative process of organic precursors in addition to provide a proper environment for Fenton like reactions. We have added the related discussion in the manuscript. “In addition to the contribution from Fenton reactions after 12:00, the precursors of oxalic acid such as glyoxylic acid have higher reaction rate with  $\bullet\text{OH}$  at high pH based on previous studies(Ervens et al., 2003;Herrmann, 2003;Cheng et al., 2015), thus the increase of pH not only enhances  $\bullet\text{OH}$  production from photo-Fenton reactions, but also promotes the oxidation process of the precursors of oxalic acid by  $\bullet\text{OH}$ .” has been added in lines 392-397.

d) At very low pH (< 1.23), it is expected that oxalic acid is present in undissociated form and therefore not able to make salts or complexes that ‘trap’ it in the particle phase. This fact contradicts the trend of increased oxalate concentrations at low pH. This should be discussed.

**Response:** Oxalic acid is predominantly enriched in particle phase due to its low vapor pressure ( $3.5\times 10^{-5}$  Torr) (Prenni et al., 2001) and high water solubility. Several studies have indicated that more than 70% of oxalic acid could exist in particle phase (Limbeck et al., 2001;Mochida et al., 2003a;Mochida et al., 2003b). The salt and complex formation of oxalate with ammonium, potassium, sodium and metal ions

have been considered as the main behavior of oxalic acid in the particle phase (Yao et al., 2002; Moffet et al., 2008; Furukawa and Takahashi, 2011), and a higher pH condition would be more favorable for the salt and complex formation. Due to the abundant signals of potassium, sodium and metal ions in this work, oxalic acid can react with these anions and stay in the particle phase. Besides, the oxalic acid particles and in-situ pH both exhibited an increase in the afternoon, which was in accordance with the announcement of more oxalate at higher pH.

e) The proposed mechanism is by no means new or detailed (l. 360). It does not include any sinks of oxalate, nor complex formation. It is one possible formation mechanism of oxalic acid from glyoxal. The generalization to dicarbonyls and aldehydes is not correct since only small compounds (C2) will follow the suggested reaction pathways.

**Response:** The photochemical production of oxalic acid has been studied in many field researches due to a similar diurnal pattern with O<sub>3</sub> (Kawamura and Ikushima, 1993; Kawamura and Yasui, 2005; Aggarwal and Kawamura, 2008; Miyazaki et al., 2009), but the detailed photochemical formation process of oxalic acid has not been comprehensively discussed. While the oxidation of glyoxal and glyoxylic acid has been proposed and discussed in many field, laboratory and model studies (Myriokefalitakis et al., 2011; Wang et al., 2012; Kawamura et al., 2013; Ervens et al., 2014; Wang et al., 2014), the influential factors of their oxidation reactions with •OH still needs to be ascertained from the field studies. Based on a comprehensive discussion of the mixing state of oxalic acid with secondary ions and transition metals, we propose a plausible explanation to connect among the diurnal pattern of O<sub>3</sub>, oxalic acid, iron and in-situ pH. (Sorooshian et al., 2013; Zhou et al., 2015). However, without the direct measurement of the concentrations of •OH, iron ions, and oxalic acid, the proposed photochemical formation mechanism of oxalic acid in the original manuscript is difficult to be confirmed. Thus, we have changed the expression about the oxalic acid production in HM type particles into a plausible explanation instead of a proposed formation mechanism, and have softened our tone in the discussions. The schematic diagram to explain the formation process of oxalic acid in the HM type particles has been moved to the supplement material in Figure S6. The related discussion has been revised as follows:

In the abstract “Furthermore, favorable in-situ pH (2-4) conditions were observed, which promote Fenton like reactions for efficient production of •OH in HM type particles. A mechanism in which products of photochemical oxidation of VOCs partitioned into the aqueous phase of HM particles, followed by multistep oxidation of •OH through Fenton like reactions to form oxalic acid is proposed.” has been changed to “The favorable in-situ pH (2-4) and the dominance of transition metal ions in oxalic acid particles can be plausibly explained by the enhanced production of •OH from Fenton like reaction, which can promote the oxalic acid production from the oxidation of precursors by •OH in HM type particles.” in lines 55-58.

“Based on above discussions, detailed mechanism for oxalic acid formation in acidic aqueous phase of particles is proposed for our field observations (Figure 8).”

has been changed to “Based on above discussions of the mixing state of oxalic acid with secondary ions and transition metals, a plausible explanation to the formation process of oxalic acid in the HM type oxalic acid particles is proposed (Figure S6).” in lines 398-400.

In the conclusion “The favorable in-situ pH and the dominance of transition metal ions in oxalic acid particles suggests an enhanced production of  $\bullet\text{OH}$  from Fenton like reactions. A mechanism involving the photochemical production of VOCs via efficient aqueous phase reactions with enhanced  $\bullet\text{OH}$  to oxalic acid was proposed.” has been changed to “Furthermore, suitable in-situ pH is favorable for Fenton like reactions to produce  $\bullet\text{OH}$  in HM type particles, and might promote the oxalic acid production from the oxidation of precursors by  $\bullet\text{OH}$  in HM type particles.” in lines 504-506.

To address the referee’s concern, we have revised the description of dicarbonyls and aldehydes in Figure S6. The “dicarbonyls and aldehydes” has been changed to “Low molecular weight dicarbonyls (e.g. glyoxal)”, and “Hydrated dicarbonyls and aldehydes” has been changed to “Hydrated dicarbonyls (e.g. glyoxal)” in Figure S6:

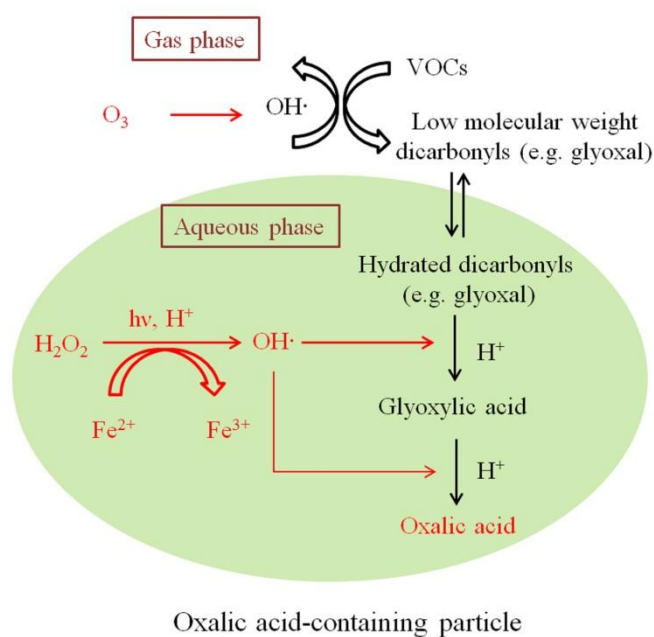

Figure S6. A schematic diagram to explain the formation process of oxalic acid in the HM type particles: the red steps are enhanced by photochemical activities in the current study.

2. The number fraction of oxalate containing particles seems very low. Is this comparable to other measurements? What was the mass fraction of oxalate (a) in the particles and (b) related to the total aerosol loading?

**Response:** Yang et al. (2009) has measured the oxalic acid-containing particles in the urban area of Shanghai by ATOFMS and found 15,789 oxalate-containing particles, accounting for 3.4% of the total collected particles. In this work 13,109 and 20,504 of oxalic acid-containing particles were obtained in summer and winter

separately, accounting for 2.5% and 2.7% of the total detected particles. The abundance of oxalic acid-containing particles in this work was lower than the reported studies in the urban area of Shanghai (3.4%), which was possibly due to less anthropogenic precursors for oxalic acid at the rural sampling site in Heshan. Higher abundance of oxalic acid particles (1-40%) was observed in the much cleaner western Pacific Ocean by Sullivan et al. (2007), which corresponded to higher ambient concentration of DCAs ( $19 \pm 4.8\%$ ) in total particulate organic matter. From the reported studies in PRD (Yao et al. 2004; Ho et al. 2011), the abundance of DCAs was 1-3.5% in total organic matter, which was much lower than those in the western Pacific Ocean, leading to lower percentage of oxalic acid-containing particles in this work. We have added the comparison between this work and the study in Shanghai in the manuscript. “The percentage of oxalic acid-containing particles in total particles in this work was comparable to the reported value in the urban area of Shanghai (3.4%) (Yang et al., 2009). However, these percentages are in general much lower than those reported in cleaner environments such as the western Pacific Ocean where oxalic acid was found in up to 1-40% of total particles due to little anthropogenic influences (Sullivan and Prather, 2007).” is added in lines 192-198.

For the second question, the relative fraction of oxalic acid particles in total detected particles was accounting for 2.5% and 2.7% of the total detected particles in summer and winter (Figure 1a). However, because we didn't collect filter samples during the sampling period, we cannot calculate the relative mass fraction of oxalic acid in ambient  $PM_{2.5}$ .

3. Was all iron in the particles in form of soluble iron, i.e. available for reaction?

**Response:** Indeed, it would be more convincing to discuss the role of Fenton reactions in the formation of oxalic acid particles if we could obtain the concentration of  $Fe^{2+/3+}$  ions. However, we didn't collect filter samples during the sampling period, so the concentration of  $Fe^{2+/3+}$  ions were not measured. Besides, the SPAMS could only detect the peak area of iron element, and the different valence state of iron could not be distinguished. Therefore, the discussions between Fenton reactions and oxalic acid production have been revised to a plausible explanation instead of a proposed formation mechanism.

4. Oxalate and the other DCAs usually represent only a very small fraction of the total organic aerosol mass. Therefore the title is misleading as it talks about SOA in general.

**Response:** Based on the comments from you and other reviews, the title “Mixing state of oxalic acid containing particles in the rural area of Pearl River Delta, China: implication for seasonal formation mechanism of Secondary Organic Aerosol (SOA)” has been changed to “Mixing state of oxalic acid containing particles in the rural area of Pearl River Delta, China: implications for the formation mechanism of oxalic

acid”.

5. It seems based on Figure S5, that RH was always < 100% (except a very brief period). Therefore, the discussed aqueous chemistry will have to take place in aqueous aerosol. There are many studies that have discussed different reaction pathways in aqueous aerosol vs cloud [e.g., Tan et al., 2009; Lim et al., 2010] with less efficient oxalate formation in the former. In addition, it seems likely that iron ions might be less dissolved in the rather highly concentrated aqueous aerosol solutions. All discussion is about chemistry as it happens in cloud droplets. These two regimes should be differentiated.

**Response:** While the aqueous phase formation of oxalic acid from organic precursors has been found both in cloud droplets and aerosols water, the more efficient production in cloud droplets than aerosols water has been reported by several studies (Tan et al., 2009; Lim et al., 2010; Myriokefalitakis et al., 2011). In this work, the well internally mixing state between oxalic acid and sulfate in summer and winter suggests a common production route of oxalic acid and sulfate, likely aqueous phase reactions. The strong photochemical pattern of oxalic acid particles with O<sub>3</sub> under the condition of RH below 100% implies a less influence from cloud-processing of oxalic acid particles. Thus we speculate the oxalic acid formation process in HM type particles is related to aqueous phase reactions in aerosols, and this point has been stated in the manuscript: “Based on above discussions of the mixing state of oxalic acid with secondary ions and transition metals, a plausible explanation to the formation process of oxalic acid in the HM type oxalic acid particles is proposed (Figure S6). In summer strong photochemical activity and high O<sub>3</sub> concentrations in the afternoon lead to more production of reactive radicals such as •OH and HO<sub>2</sub>•, which promote the oxidation of VOCs to dicarbonyls and aldehydes (e.g. glyoxal and methylglyoxal), followed by a subsequent partitioning into the aqueous phase of particles” in lines 398-404.

Although the reviewer has pointed out that iron ions might be less dissolved in the rather highly concentrated aqueous aerosol solutions, the low in-situ pH of aerosols is also favorable for the dissolved of iron. Because we didn't collect filter samples during the sampling period, the concentration of Fe<sup>2+/3+</sup> ions were not measured, so the ratio of Fe<sup>2+/3+</sup> ions to total iron element could not be evaluated for now, and we will further discuss this issue in our next study.

6. While briefly discussed, it is not clear to what extent different air masses cause different oxalate levels. How much of the measured oxalate is background material? Did other meteorological conditions affect the concentrations such as changes in boundary layer?

**Response:** The different air masses arriving in sampling site in summer and winter had substantial impact on the amount of organic precursors from

anthropogenic emissions. More carbonaceous signals were found in the oxalic acid particles in winter since oxalic acid is mainly derived from secondary oxidation of VOCs and subsequent intermediates. However, it is still difficult to quantify exactly the increase of oxalic acid concentration in winter based on the SPAMS data. The sampling site in this work is a rural site and the aerosols are influenced by the regional transport in PRD. Although we cannot obtain the exact background level of oxalic acid, the lowest percentage of oxalic acid particles in total detected particles is used to evaluate the approximate background level of oxalic acid particles. The lowest hourly percentage of oxalic acid particles in total detected particles were 0.1% and 0.5 % in summer and winter, which were much lower than the average value in summer (2.3%) and winter (2.8%), suggesting a small impact of the background distribution to the measurements of oxalic acid particles.

The wind speed was from 0.3 to 4.0 m s<sup>-1</sup> with an average of 1.6 m s<sup>-1</sup> during the sampling period in winter, which indicated a rather stagnant atmospheric condition. The stagnant atmospheric condition in winter was favorable for the aging process of aerosols and might have contributed to the broader size distribution of oxalic acid particles. Unfortunately the height of boundary layer was not available in this work. Nevertheless, the relative abundance of oxalic acid particles had no obvious increase at night and the lower mixing height may not be an important factor during the formation process of oxalic acid in the winter. We will further examine their relationships in our next study.

The diurnal variations of meteorological factors such as temperature, RH and wind speed have been discussed in Figure S7.

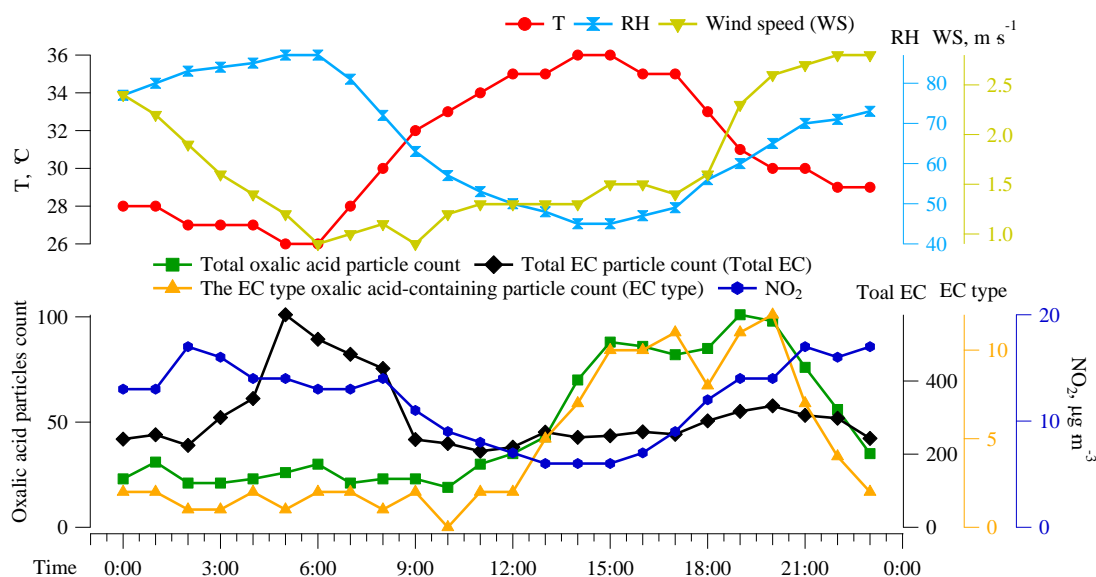

Figure S7. The diurnal variations of temperature (T), RH, wind speed (WS), oxalic acid particles, total EC particles, the EC type oxalic acid-containing particles and ambient NO<sub>2</sub> concentrations from July 28 to August 1 in 2014.

We have added the related discussion in the manuscript. “The diurnal patterns of temperature, wind speed are presented in Figure S7. The high temperature between 9:00 and 19:00 was favorable to the secondary processing of organic precursors. The



wind speed was low during the whole day, especially between 9:00 and 18:00, which provided a stagnant environment for the increase in oxalic acid produced from photochemical process. The influence from traffic emission was investigated through the diurnal variations of total EC type particles and NO<sub>2</sub> (Figure S7). The EC type particles increased from 12:00 to 21:00, which had same variation as total oxalic acid, but NO<sub>2</sub> followed the rush hour pattern with two peaks from 5:00 to 8:00 and from 18:00 to 21:00. Traffic emission is not expected to have a large contribution to oxalic acid in this study.” has been added in lines 417-426 in the manuscript.

7. I am not sure what Figure S6 is really showing. Does it show a correlation of organosulfur particles and oxalate or does it simply show that more particles cause higher concentrations of ‘everything’? How about the mixing state of organosulfur compounds and oxalic acid particles? The fact that they are in the same particle class, does not necessarily mean that they are internally mixed and therefore their formation pathways are related.

**Response:** The original Figure S6 (now Figure S8) presented the temporal variation of total organosulfate (m/z=-155) containing particles during whole sampling periods in Heshan, China. The temporal trend of organosulfate-containing oxalic acid particles in winter has been added in Figure S8, which exhibited a similar pattern as the total oxalic acid particles. The percentage of organosulfate-containing oxalic acid particles in total oxalic acid particles ranged from 0 to 16.4% with the highest ratio observed on February 8. The linear regression between oxalic acid particles and organosulfate particles in Figure 9b has been replaced by the correlation between organosulfate-containing oxalic acid particles and total oxalic acid particles, and the robust correlation ( $r^2=0.81$ ) between them supports a possible production of oxalic acid from acid-catalyzed reactions.

We also believe more evidence and discussion are needed to support the connection between oxalic acid formation process and acidic aqueous phase chemistry. So the related discussions have added as follows:

“Despite lower O<sub>3</sub> concentrations and photochemical activity in winter, oxalic acid particles were still prevalent in carbonaceous particles, especially BB type particles. While oxalic acid was found to be internally mixed with sulfate and nitrate both in summer and winter, the nitric acid was only observed in oxalic acid particles in winter, indicating a strongly acidic nature of oxalic acid particles in winter. Considering a possible connection of oxalic acid production with the acidic environment, the temporal concentrations of oxalic acid, sulfate and nitrate were investigated through their peak areas in the carbonaceous type oxalic acid particles including EC, OC, ECOC and BB type in Figure 8. The peaks of m/z -62[NO<sub>3</sub>]<sup>-</sup> and -97[HSO<sub>4</sub>]<sup>-</sup> represent nitrate and sulfate, respectively. Nitrate, sulfate and oxalic acid showed very similar variation patterns in winter, indicating a close connection of their co-existence. Although nitric acid was found in the oxalic acid particles, the acidity of the oxalic acid particles was not estimated since the real-time concentration of inorganic ions was not available during the sampling period in winter. Instead the

relative acidity ratio ( $R_{ra}$ ), defined as the ratio of total peak areas of nitrate and sulfate to the peak area of ammonium ( $m/z$  18 $[NH_4]^+$ ), was used (Denkenberger et al., 2007; Pratt et al., 2009). The  $R_{ra}$  of carbonaceous type oxalic acid particles ranged from 7 to 114 with an average value of 25 (Figure 8), indicating an intensely acidic environment of carbonaceous type oxalic acid particles in winter. Several studies have reported potential production of oxalic acid from acid-catalyzed aqueous phase reactions in aerosols (Carlton et al., 2006; Carlton et al., 2007; Tan et al., 2009). In this work the acidic environment of the carbonaceous type oxalic acid particles and similar variation patterns among oxalic acid, sulfate and nitrate may suggest a relationship between the degradation of organic precursors and the acidic chemical process. However, the temporal change of  $R_{ra}$  did not follow a similar trend as the peak area of oxalic acid in most particles, possibly due to the multi-step formation of oxalic acid influenced by many factors such as precursors, liquid water content and ion strength (Carlton et al., 2007; Cheng et al., 2013; Cheng et al., 2015).” has been added in lines 428-455.

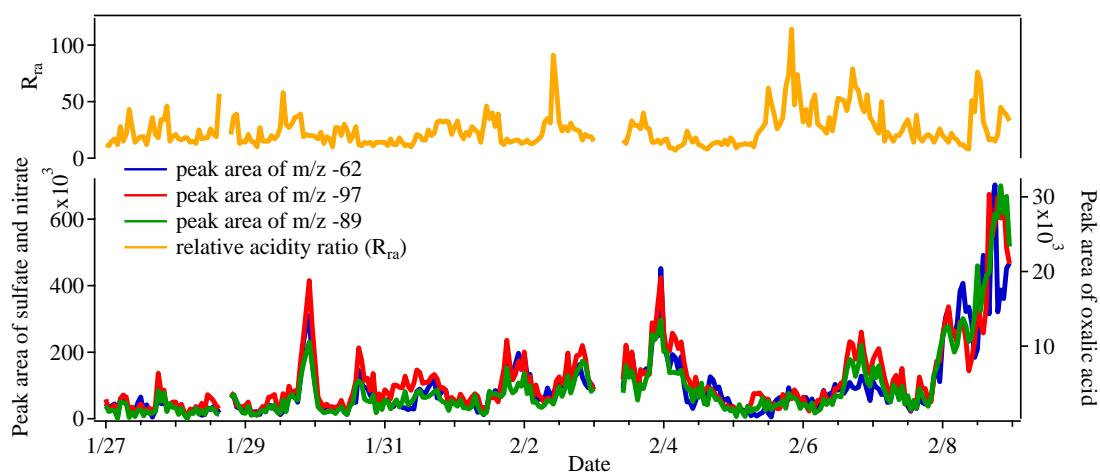

Figure 8. The temporal variations of peak area of nitrate, sulfate and oxalic acid, and the relative acidity ratio ( $R_{ra}$ ) in carbonaceous type oxalic acid particles in winter.

The related discussions about Figure 9 and Figure S8 have been revised: “The organosulfate derived from glyoxal requires acidic aqueous environment of particles, and herein is used as an indicator of acid-catalyzed ageing process of organic compounds. The temporal variation of organosulfate ( $m/z=-155$ ) containing particles during the entire sampling period in Heshan, China is shown in Figure S6. During the episode, oxalic acid particles had moderate linear correlation with organosulfate particles (Figure 9b).” has been changed to “The formation of organosulfates from glyoxal requires an acidic aqueous environment, which can be used as an indicator of acid-catalyzed ageing process of organic compounds. The temporal trend of organosulfate-containing oxalic acid particles in winter is shown in Figure S8, which exhibited a similar pattern as the total oxalic acid particles during the whole sampling period in winter. The percentage of organosulfate-containing oxalic acid particles in total oxalic acid particles ranged from 0 to 16.4% with the highest ratio observed in

the episode (February 8). The linear regression between total oxalic acid particles and organosulfate-containing oxalic acid particles in the episode is exhibited in Figure 9b, and the robust correlation ( $r^2=0.81$ ) between them suggests that oxalic acid and organosulfate may share similar formation process.” in lines 476-486.

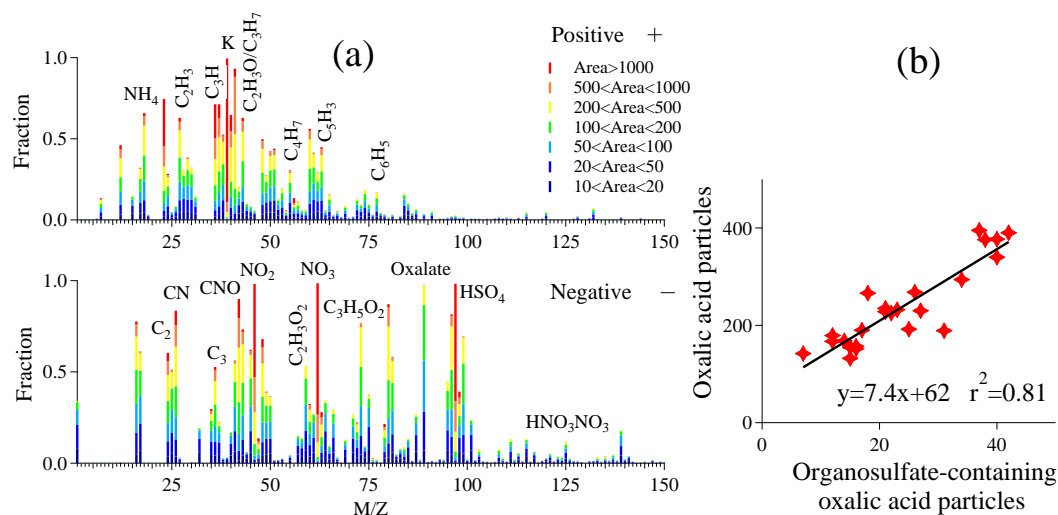

Figure 9. The comprehensive study of oxalic acid particles increase on Feb 8, 2015: (a) The digitized positive and negative ion mass spectrum of oxalic acid particles during the episode; (b) Linear regression between total oxalic acid particles and organosulfate-containing oxalic acid particles (m/z -155).

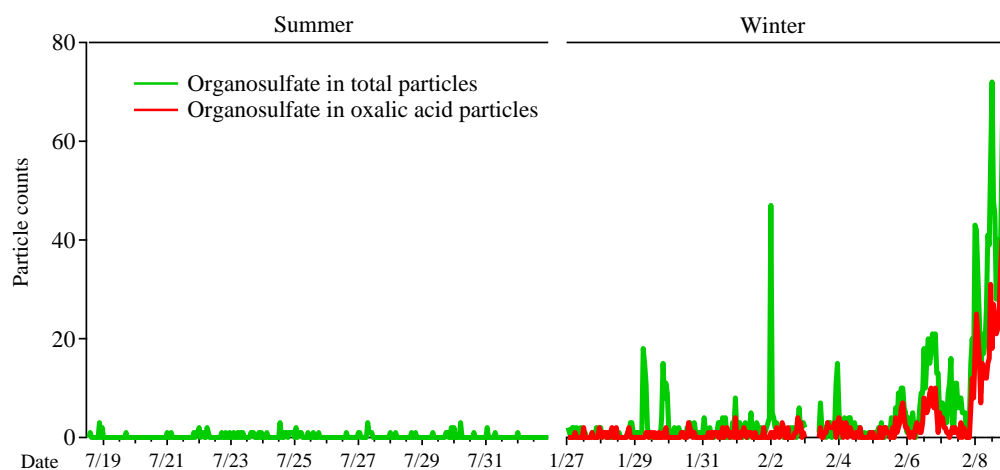

Figure S8. Temporal variation of organosulfate (m/z=-155) containing particles in total particles and in oxalic acid particles in Heshan, China.

“The temporal trend of organosulfate-containing oxalic acid particles in winter is also shown in Figure S8, which exhibited a similar pattern as the total oxalic acid particles. The percentage of organosulfate-containing oxalic acid particles in total oxalic acid particles ranged from 0 to 16.4% with the highest ratio observed on February 8.” has been added in the supplement material.

## Minor comments

1. L.83: Oxalic acid does not have a low vapor pressure. Its presence in ambient particles is due to salt and/or complex formation (cf also comment 1d).

**Response:** Oxalic acid is predominantly enriched in aerosols phase due to low vapor pressure ( $3.5 \times 10^{-5}$  Torr) (Prenni et al., 2001) and high water solubility. Several field studies all indicated more than 70% of oxalic acid exist in aerosol phase (Limbeck et al., 2001; Mochida et al., 2003a; Mochida et al., 2003b). The salt and complex formation of oxalate with ammonium, potassium, sodium and metal ions have been considered as the main behavior of oxalic acid in the particle phase (Yao et al., 2002; Moffet et al., 2008; Furukawa and Takahashi, 2011), and a higher pH condition would be more favorable for the salt and complex formation. Due to the abundant signals of potassium, sodium and metal ions in this work, oxalic acid can react with these anions and stay in the particle phase. Besides, the oxalic acid particles and in-situ pH both exhibited an increase in the afternoon, which was in accordance with the announcement of more oxalate at higher pH.

2. L.119/120: There are several studies that have shown good agreement between predicted and measured oxalate levels [e.g., Wonaschuetz et al., 2012]

**Response:** This reference has been cited in the manuscript as “A number of ground based and airborne field studies have found a tight correlation between oxalic acid and sulfate in ambient particles and cloud droplets, relating aqueous phase chemistry to the formation of oxalic acid in aerosols and cloud droplets (Yao et al., 2002; Yao et al., 2003; Yu et al., 2005; Sorooshian et al., 2006; Sorooshian et al., 2007a; Sorooshian et al., 2007b; Miyazaki et al., 2009; Wonaschuetz et al., 2012; Wang et al., 2016).” in lines 99-104.

3. L. 121 and 122: These sentences are repetitive.

**Response:** “So far the formation mechanism of oxalic acid especially in urban areas is still not clear. Online measurements of the mixing state of oxalic acid provides a powerful context to better understand the formation of oxalic acid in aerosol particles and cloud droplets.” has been changed to “While the formation mechanism of oxalic acid especially in urban areas is still not clear, online measurements of the mixing state of oxalic acid provide a powerful tool to better understand the formation of oxalic acid in aerosol particles and cloud droplets.” in lines 122-125.

4. L. 240: The study by Sorooshian et al. focused mostly on the destruction of oxalate in the presence of iron.

**Response:** “In summer HM type particles (purple) and total oxalic acid particles exhibited similar diurnal patterns, suggesting a possibly connection between the production of oxalic acid and the transition metals (e.g. Fe, Cu) (Sorooshian et al., 2013).” has been changed to “In summer HM type particles (orange color) and total

oxalic acid particles exhibited similar diurnal patterns, suggesting a possible connection between the production of oxalic acid and the transition metals (e.g. Fe, Cu) (Zhou et al., 2015).” in lines 269-271.

5. L. 264, and other places: ‘Mixing ratio’ usually refers to the ratio of molecules of one type to the total number of molecules (e.g. ppb = 1 in  $10^9$  molecules). The authors should change their wording as I assume here ‘mixing ratio’ is used in the meaning of ‘number of particles that are internally mixed’.

**Response:** The “mixing ratio” has been replaced by “percentage” in the manuscript. “The mixing ratios of oxalic acid particles with sulfate, nitrate and ammonium (SNA) were investigated through the relative abundance of SNA-containing oxalic acid particles in total oxalic acid particles (Figure 3).” has been changed to “The mixing state of oxalic acid particles with sulfate, nitrate and ammonium (SNA) was investigated through the percentage of SNA-containing oxalic acid particles in total oxalic acid particles (Figure 3).” in lines 294-296.

“Oxalic acid was found to be internally mixed with sulfate and nitrate during both sampling periods with mixing ratio of 93% and 94% in summer respectively, and both 98% in winter (Figure 3 a).” has been changed to “Oxalic acid was found to be internally mixed with sulfate and nitrate during both sampling periods with percentage of 93% and 94% in summer respectively, and both 98% in winter (Figure 3 a).” in lines 296-298.

“However, the mixing ratio of  $\text{NH}_4^+$  with oxalic acid was only 18% in summer but increased to 71% in winter. Linear correlations between  $\text{NH}_4^+$ -containing oxalic acid particles ( $\text{C}_2\text{-NH}_4^+$ ) and total oxalic acid particles are depicted in Figure 3” has been revised to “However, the percentage of  $\text{NH}_4^+$  with oxalic acid was only 18% in summer but increased to 71% in winter. Linear correlations between  $\text{NH}_4^+$ -containing oxalic acid particles ( $\text{C}_2\text{-NH}_4^+$ ) and total oxalic acid particles are depicted in Figure 3” in lines 299-301.

“The low mixing ratio of  $\text{NH}_4^+$  in oxalic acid particles in summer indicated the presence of oxalic acid in  $\text{NH}_4^+$ -poor particles.” has been changed to “The low percentage of  $\text{NH}_4^+$  in oxalic acid particles in summer indicated the presence of oxalic acid in  $\text{NH}_4^+$ -poor particles.” in lines 302-304.

6. L. 289: Are all particle larger in winter than in summer or only those that contain oxalic acid?

**Response:** The discussion about size change only refers to oxalic acid containing particles.

7. L. 296-300: The mentioning of malonic acid is distracting here and does not lead to additional evidence or insights.

**Response:** Malonic acid is another product of photochemical oxidation of organic compounds according to many field studies (Kawamura and Ikushima, 1993; Wang et al., 2012; Meng et al., 2013; Meng et al., 2014), so we have discussed

the variation pattern of malonic acid in order to provide more evidence for the photochemical behavior of DCAs, thus we decide to keep this part.

8. L. 316: It is true that OH (like all other radicals) has a relatively short life time in the gas phase. However, the partitioning to the aqueous phase is limited due to its even shorter lifetime in the aqueous phase. Its solubility and the quick consumption in the aqueous phase leads to the limitation.

**Response:** “While the partition of •OH from gas to aqueous phase is limited by its low Henry’s law constant ( $K_{H,OH}=30 \text{ M atm}^{-1}$ ) and short lifetime of •OH in the gas phase (Hanson et al., 1992), the main sources of aqueous •OH are from the photolysis of  $\text{H}_2\text{O}_2$ ,  $\text{NO}_3^-$ ,  $\text{NO}_2^-$ , and chromophoric dissolved organic matter (CDOM) (Yu et al., 2014;Badali et al., 2015;Gligorovski et al., 2015;Tong et al., 2016). Among these sources the photolysis of  $\text{H}_2\text{O}_2$  through Fenton reactions involving the catalysis of transition metal ions like  $\text{Fe}^{2+/3+}$ ,  $\text{Cu}^{+/2+}$  and  $\text{Mn}^{2+/3+}$  is an efficient source of •OH (Deguillaume et al., 2005;Herrmann et al., 2005;Ervens et al., 2014).” has been changed to “The main sources of •OH in the aqueous phase contain both direct uptake from the gas phase and the chemical sources in the aqueous phase such as Fenton type reactions and photolysis of  $\text{H}_2\text{O}_2$ ,  $\text{NO}_3^-$ ,  $\text{NO}_2^-$ , and chromophoric dissolved organic matter (CDOM) (Yu et al., 2014;Badali et al., 2015;Ervens, 2015;Gligorovski et al., 2015;Herrmann et al., 2015;Tong et al., 2016). Considering low Henry’s law constant of •OH ( $K_{H,OH}=30 \text{ M atm}^{-1}$ ) (Hanson et al., 1992) and abundant fraction of transition metal ions in the oxalic acid particles, the photolysis of  $\text{H}_2\text{O}_2$  through Fenton reactions involving the catalysis of transition metal ions like  $\text{Fe}^{2+/3+}$ ,  $\text{Cu}^{+/2+}$  and  $\text{Mn}^{2+/3+}$  likely contributes substantially to the source of •OH in the aqueous phase in this work (Deguillaume et al., 2005;Herrmann et al., 2005;Ervens et al., 2014).” in lines 345-355.

9. L. 320: Fenton reaction is not a photolysis. In l. 337, it is stated correctly that Fenton reactions do not need necessarily light.

**Response:** We agree with the reviewer’s comment. This point has been properly clarified in the manuscript.

10. L. 344: What are the influences of pH (is) from RH and inorganic ions? Figure S5 does not include any discussion.

**Response:** In the current work the  $pH_{is}$  of ambient particles ranged from -1.42 to 4.01, and the influences of  $pH_{is}$  from RH and inorganic ions are discussed in Figure S5. The related discussion has already been presented in the supplement as follows:

The  $pH_{is}$  of ambient particles ranged from -1.42 to 4.01, which indicate that fine particles in the sampling site are highly acidic. These values are within the range of previous studies that investigated  $pH_{is}$  through filter-based and real-time measurements in the PRD area (Pathak et al., 2004;Yao et al., 2006;Xue et al., 2011). Based on the calculation equation, the  $pH_{is}$  is determined by the free amount of  $\text{H}^+$  and liquid water content (LWC) in the aerosols. LWC is strongly dependent on the ambient RH and affected by water-soluble composition in the aerosols. Thus we

investigate the diurnal patterns of RH, major inorganic ions and the free amount of  $H^+$  in Figure S5. Although RH increased from 00:00 to 07:00,  $H^+$  had higher concentration during this period than the other time, which resulted the lower value of  $pH_{is}$  (between -1.42 and 0) from 00:00 to 05:00. Thus more acidic aerosols with  $pH_{is}$  below 0 were observed due to the combined effects of the RH and relative abundance of  $H^+$  in aerosols.

11. L. 354: Not clear why ‘on the other hand’ as the following sentence is just another example of oxalate degradation.

**Response:** “On the other hand, photolysis of  $Fe(oxalate)_n^{3-2n}$  can contribute to 99% of the overall degradation of oxalic acid” has been changed to “Furthermore, photolysis of  $Fe(oxalate)_n^{3-2n}$  can contribute to 99% of the overall degradation of oxalic acid” in lines 387-388.

12. L. 439/440: This is a very strong and vague statement. How do the results of the current study help improving climate models and air pollution mitigation strategies?

**Response:** “The current study also indicates that SPAMS can be a robust tool for exploring the formation and transformation processes of SOA, contributing to the improvement of global climate modeling and the development of effective air pollution mitigation strategies.” has been changed to “The current study demonstrates that SPAMS is a unique tool for understanding the mixing states of different components of ambient aerosols, which are useful for exploring the formation and evolution process of SOA.” in lines 512-515.

Technical comments

13. L. 102: replace ‘suggest’ by ‘suggested’

**Response:** The correction has been made in line 105.

14. L. 181: replace ‘introducing’ by ‘introduced’

**Response:** The correction has been made in line 184.

15. L. 240: replace ‘possibly’ by ‘possible’

**Response:** The correction has been made in line 270.

16. L. 273: remove ‘that’

**Response:** The correction has been made in line 303.

## Reference:

Aggarwal, S. G., and Kawamura, K.: Molecular distributions and stable carbon isotopic compositions

- of dicarboxylic acids and related compounds in aerosols from Sapporo, Japan: Implications for photochemical aging during long-range atmospheric transport, *Journal of Geophysical Research-Atmospheres*, 113, D14301, 10.1029/2007jd009365, 2008.
- Badali, K. M., Zhou, S., Aljawhary, D., Antinolo, M., Chen, W. J., Lok, A., Mungall, E., Wong, J. P. S., Zhao, R., and Abbatt, J. P. D.: Formation of hydroxyl radicals from photolysis of secondary organic aerosol material, *Atmospheric Chemistry and Physics*, 15, 7831-7840, 10.5194/acp-15-7831-2015, 2015.
- Carlton, A. G., Turpin, B. J., Lim, H. J., Altieri, K. E., and Seitzinger, S.: Link between isoprene and secondary organic aerosol (SOA): Pyruvic acid oxidation yields low volatility organic acids in clouds, *Geophysical Research Letters*, 33, L06822, 10.1029/2005gl025374, 2006.
- Carlton, A. G., Turpin, B. J., Altieri, K. E., Seitzinger, S., Reff, A., Lim, H. J., and Ervens, B.: Atmospheric oxalic acid and SOA production from glyoxal: Results of aqueous photooxidation experiments, *Atmospheric Environment*, 41, 7588-7602, 10.1016/j.atmosenv.2007.05.035, 2007.
- Cheng, C., Wang, G., Meng, J., Wang, Q., Cao, J., Li, J., and Wang, J.: Size-resolved airborne particulate oxalic and related secondary organic aerosol species in the urban atmosphere of Chengdu, China, *Atmospheric Research*, 161, 134-142, 2015.
- Cheng, C. L., Wang, G. H., Zhou, B. H., Meng, J. J., Li, J. J., Cao, J. J., and Xiao, S.: Comparison of dicarboxylic acids and related compounds in aerosol samples collected in Xi'an, China during haze and clean periods, *Atmospheric Environment*, 81, 443-449, 10.1016/j.atmosenv.2013.09.013, 2013.
- Deguillaume, L., Leriche, M., Desboeufs, K., Mailhot, G., George, C., and Chaumerliac, N.: Transition metals in atmospheric liquid phases: Sources, reactivity, and sensitive parameters, *Chem Rev*, 105, 3388-3431, 10.1021/cr040649c, 2005.
- Denkenberger, K. A., Moffet, R. C., Holecek, J. C., Rebotier, T. P., and Prather, K. A.: Real-time, single-particle measurements of oligomers in aged ambient aerosol particles, *Environmental Science & Technology*, 41, 5439-5446, 10.1021/es070329l, 2007.
- Ervens, B., Gligorovski, S., and Herrmann, H.: Temperature-dependent rate constants for hydroxyl radical reactions with organic compounds in aqueous solutions, *Phys Chem Chem Phys*, 5, 1811-1824, Doi 10.1039/B300072a, 2003.
- Ervens, B., Sorooshian, A., Lim, Y. B., and Turpin, B. J.: Key parameters controlling OH-initiated formation of secondary organic aerosol in the aqueous phase (aqSOA), *Journal of Geophysical Research-Atmospheres*, 119, 3997-4016, 10.1002/2013JD021021, 2014.
- Ervens, B.: Modeling the Processing of Aerosol and Trace Gases in Clouds and Fogs, *Chem Rev*, 115, 4157-4198, 10.1021/cr5005887, 2015.
- Furukawa, T., and Takahashi, Y.: Oxalate metal complexes in aerosol particles: implications for the hygroscopicity of oxalate-containing particles, *Atmospheric Chemistry and Physics*, 11, 4289-4301, 10.5194/acp-11-4289-2011, 2011.
- Gligorovski, S., Strekowski, R., Barbati, S., and Vione, D.: Environmental Implications of Hydroxyl Radicals ( $\bullet\text{OH}$ ), *Chem Rev*, 115, 13051-13092, 10.1021/cr500310b, 2015.
- Hanson, D. R., Burkholder, J. B., Howard, C. J., and Ravishankara, A.: Measurement of hydroxyl and hydroperoxy radical uptake coefficients on water and sulfuric acid surfaces, *The Journal of Physical Chemistry*, 96, 4979-4985, 1992.
- Herrmann, H.: Kinetics of aqueous phase reactions relevant for atmospheric chemistry, *Chem Rev*, 103, 4691-4716, Doi 10.1021/Cr020658q, 2003.



- Herrmann, H., Tilgner, A., Barzaghi, P., Majdik, Z., Gligorovski, S., Poulain, L., and Monod, A.: Towards a more detailed description of tropospheric aqueous phase organic chemistry: CAPRAM 3.0, *Atmospheric Environment*, 39, 4351-4363, 10.1016/j.atmosenv.2005.02.016, 2005.
- Herrmann, H., Schaefer, T., Tilgner, A., Styler, S. A., Weller, C., Teich, M., and Otto, T.: Tropospheric Aqueous-Phase Chemistry: Kinetics, Mechanisms, and Its Coupling to a Changing Gas Phase, *Chem Rev*, 115, 4259-4334, 10.1021/cr500447k, 2015.
- Kawamura, K., and Ikushima, K.: seasonal-changes in the distribution of dicarboxylic-acids in the urban atmosphere, *Environmental Science & Technology*, 27, 2227-2235, 10.1021/es00047a033, 1993.
- Kawamura, K., and Yasui, O.: Diurnal changes in the distribution of dicarboxylic acids, ketocarboxylic acids and dicarbonyls in the urban Tokyo atmosphere, *Atmospheric Environment*, 39, 1945-1960, 10.1016/j.atmosenv.2004.12.014, 2005.
- Kawamura, K., Tachibana, E., Okuzawa, K., Aggarwal, S. G., Kanaya, Y., and Wang, Z. F.: High abundances of water-soluble dicarboxylic acids, ketocarboxylic acids and alpha-dicarbonyls in the mountaintop aerosols over the North China Plain during wheat burning season, *Atmospheric Chemistry and Physics*, 13, 8285-8302, 10.5194/acp-13-8285-2013, 2013.
- Lim, Y. B., Tan, Y., Perri, M. J., Seitzinger, S. P., and Turpin, B. J.: Aqueous chemistry and its role in secondary organic aerosol (SOA) formation, *Atmospheric Chemistry and Physics*, 10, 10521-10539, 10.5194/acp-10-10521-2010, 2010.
- Limbeck, A., Puxbaum, H., Otter, L., and Scholes, M. C.: Semivolatile behavior of dicarboxylic acids and other polar organic species at a rural background site (Nylsvley, RSA), *Atmospheric Environment*, 35, 1853-1862, 10.1016/S1352-2310(00)00497-0, 2001.
- Meng, J. J., Wang, G. H., Li, J. J., Cheng, C. L., and Cao, J. J.: Atmospheric oxalic acid and related secondary organic aerosols in Qinghai Lake, a continental background site in Tibet Plateau, *Atmospheric Environment*, 79, 582-589, 10.1016/j.atmosenv.2013.07.024, 2013.
- Meng, J. J., Wang, G. H., Li, J. J., Cheng, C. L., Ren, Y. Q., Huang, Y., Cheng, Y. T., Cao, J. J., and Zhang, T.: Seasonal characteristics of oxalic acid and related SOA in the free troposphere of Mt. Hua, central China: Implications for sources and formation mechanisms, *Science Of The Total Environment*, 493, 1088-1097, 10.1016/j.scitotenv.2014.04.086, 2014.
- Miyazaki, Y., Aggarwal, S. G., Singh, K., Gupta, P. K., and Kawamura, K.: Dicarboxylic acids and water-soluble organic carbon in aerosols in New Delhi, India, in winter: Characteristics and formation processes, *Journal of Geophysical Research-Atmospheres*, 114, D19206, 10.1029/2009jd011790, 2009.
- Mochida, M., Kawamura, K., Umemoto, N., Kobayashi, M., Matsunaga, S., Lim, H. J., Turpin, B. J., Bates, T. S., and Simoneit, B. R. T.: Spatial distributions of oxygenated organic compounds (dicarboxylic acids, fatty acids, and levoglucosan) in marine aerosols over the western Pacific and off the coast of East Asia: Continental outflow of organic aerosols during the ACE-Asia campaign, *Journal of Geophysical Research-Atmospheres*, 108, Doi 10.1029/2002jd003249, 2003a.
- Mochida, M., Umemoto, N., Kawamura, K., and Uematsu, M.: Bimodal size distribution of C-2-C-4 dicarboxylic acids in the marine aerosols, *Geophysical Research Letters*, 30, 1672, 10.1029/2003gl017451, 2003b.
- Moffet, R. C., Qin, X., Rebotier, T., Furutani, H., and Prather, K. A.: Chemically segregated optical and microphysical properties of ambient aerosols measured in a single-particle mass spectrometer, *Journal of Geophysical Research: Atmospheres*, 113, n/a-n/a, 10.1029/2007JD009393, 2008.

- Myriokefalitakis, S., Tsigaridis, K., Mihalopoulos, N., Sciare, J., Nenes, A., Kawamura, K., Segers, A., and Kanakidou, M.: In-cloud oxalate formation in the global troposphere: a 3-D modeling study, *Atmospheric Chemistry and Physics*, 11, 5761-5782, 10.5194/acp-11-5761-2011, 2011.
- O'Sullivan, D. W., Lee, M., Noone, B. C., and Heikes, B. G.: Henry's Law Constant Determinations for Hydrogen Peroxide, Methyl Hydroperoxide, Hydroxymethyl Hydroperoxide, Ethyl Hydroperoxide, and Peroxyacetic Acid, *The Journal of Physical Chemistry*, 100, 3241-3247, 10.1021/jp951168n, 1996.
- Pathak, R. K., Louie, P. K. K., and Chan, C. K.: Characteristics of aerosol acidity in Hong kong, *Atmospheric Environment*, 38, 2965-2974, 10.1016/j.atmosenv.2004.02.044, 2004.
- Pratt, K. A., Hatch, L. E., and Prather, K. A.: Seasonal Volatility Dependence of Ambient Particle Phase Amines, *Environmental Science & Technology*, 43, 5276-5281, 10.1021/es803189n, 2009.
- Prenni, A. J., DeMott, P. J., Kreidenweis, S. M., Sherman, D. E., Russell, L. M., and Ming, Y.: The effects of low molecular weight dicarboxylic acids on cloud formation, *Journal of Physical Chemistry A*, 105, 11240-11248, 10.1021/jp012427d, 2001.
- Sorooshian, A., Varutbangkul, V., Brechtel, F. J., Ervens, B., Feingold, G., Bahreini, R., Murphy, S. M., Holloway, J. S., Atlas, E. L., Buzorius, G., Jonsson, H., Flagan, R. C., and Seinfeld, J. H.: Oxalic acid in clear and cloudy atmospheres: Analysis of data from International Consortium for Atmospheric Research on Transport and Transformation 2004, *Journal of Geophysical Research-Atmospheres*, 111, 10.1029/2005jd006880, 2006.
- Sorooshian, A., Lu, M.-L., Brechtel, F. J., Jonsson, H., Feingold, G., Flagan, R. C., and Seinfeld, J. H.: On the source of organic acid aerosol layers above clouds, *Environmental Science & Technology*, 41, 4647-4654, 10.1021/es0630442, 2007a.
- Sorooshian, A., Ng, N. L., Chan, A. W. H., Feingold, G., Flagan, R. C., and Seinfeld, J. H.: Particulate organic acids and overall water-soluble aerosol composition measurements from the 2006 Gulf of Mexico Atmospheric Composition and Climate Study (GoMACCS), *Journal of Geophysical Research-Atmospheres*, 112, 10.1029/2007jd008537, 2007b.
- Sorooshian, A., Wang, Z., Coggon, M. M., Jonsson, H. H., and Ervens, B.: Observations of Sharp Oxalate Reductions in Stratocumulus Clouds at Variable Altitudes: Organic Acid and Metal Measurements During the 2011 E-PEACE Campaign, *Environmental Science & Technology*, 47, 7747-7756, 10.1021/es4012383, 2013.
- Sullivan, R. C., and Prather, K. A.: Investigations of the diurnal cycle and mixing state of oxalic acid in individual particles in Asian aerosol outflow, *Environmental Science & Technology*, 41, 8062-8069, 10.1021/es071134g, 2007.
- Tan, Y., Perri, M. J., Seitzinger, S. P., and Turpin, B. J.: Effects of Precursor Concentration and Acidic Sulfate in Aqueous Glyoxal-OH Radical Oxidation and Implications for Secondary Organic Aerosol, *Environmental Science & Technology*, 43, 8105-8112, 10.1021/Es901742f, 2009.
- Tong, H. J., Arangio, A. M., Lakey, P. S. J., Berkemeier, T., Liu, F. B., Kampf, C. J., Brune, W. H., Poschl, U., and Shiraiwa, M.: Hydroxyl radicals from secondary organic aerosol decomposition in water, *Atmospheric Chemistry and Physics*, 16, 1761-1771, 10.5194/acp-16-1761-2016, 2016.
- Wang, G., Zhang, R., Gomez, M. E., Yang, L., Levy Zamora, M., Hu, M., Lin, Y., Peng, J., Guo, S., Meng, J., Li, J., Cheng, C., Hu, T., Ren, Y., Wang, Y., Gao, J., Cao, J., An, Z., Zhou, W., Li, G., Wang, J., Tian, P., Marrero-Ortiz, W., Secret, J., Du, Z., Zheng, J., Shang, D., Zeng, L., Shao, M., Wang, W., Huang, Y., Wang, Y., Zhu, Y., Li, Y., Hu, J., Pan, B., Cai, L., Cheng, Y., Ji, Y., Zhang, F., Rosenfeld, D., Liss, P. S., Duce, R. A., Kolb, C. E., and Molina, M. J.: Persistent sulfate formation

- from London Fog to Chinese haze, *Proceedings of the National Academy of Sciences*, 113, 13630-13635, 10.1073/pnas.1616540113, 2016.
- Wang, G. H., Kawamura, K., Cheng, C. L., Li, J. J., Cao, J. J., Zhang, R. J., Zhang, T., Liu, S. X., and Zhao, Z. Z.: Molecular Distribution and Stable Carbon Isotopic Composition of Dicarboxylic Acids, Ketocarboxylic Acids, and alpha-Dicarbonyls in Size-Resolved Atmospheric Particles From Xi'an City, China, *Environmental Science & Technology*, 46, 4783-4791, 10.1021/es204322c, 2012.
- Wang, G. H., Cheng, C. L., Huang, Y., Tao, J., Ren, Y. Q., Wu, F., Meng, J. J., Li, J. J., Cheng, Y. T., Cao, J. J., Liu, S. X., Zhang, T., Zhang, R., and Chen, Y. B.: Evolution of aerosol chemistry in Xi'an, inland China, during the dust storm period of 2013-Part 1: Sources, chemical forms and formation mechanisms of nitrate and sulfate, *Atmospheric Chemistry and Physics*, 14, 11571-11585, 10.5194/acp-14-11571-2014, 2014.
- Wonaschuetz, A., Sorooshian, A., Ervens, B., Chuang, P. Y., Feingold, G., Murphy, S. M., de Gouw, J., Warneke, C., and Jonsson, H. H.: Aerosol and gas re-distribution by shallow cumulus clouds: An investigation using airborne measurements, *Journal of Geophysical Research-Atmospheres*, 117, 10.1029/2012jd018089, 2012.
- Xue, J., Lau, A. K. H., and Yu, J. Z.: A study of acidity on PM<sub>2.5</sub> in Hong Kong using online ionic chemical composition measurements, *Atmospheric Environment*, 45, 7081-7088, 10.1016/j.atmosenv.2011.09.040, 2011.
- Yang, F., Chen, H., Wang, X., Yang, X., Du, J., and Chen, J.: Single particle mass spectrometry of oxalic acid in ambient aerosols in Shanghai: Mixing state and formation mechanism, *Atmospheric Environment*, 43, 3876-3882, 2009.
- Yao, X. H., Fang, M., and Chan, C. K.: Size distributions and formation of dicarboxylic acids in atmospheric particles, *Atmospheric Environment*, 36, 2099-2107, 2002.
- Yao, X. H., Lau, A. P. S., Fang, M., Chan, C. K., and Hu, M.: Size distributions and formation of ionic species in atmospheric particulate pollutants in Beijing, China: 2 - dicarboxylic acids, *Atmospheric Environment*, 37, 3001-3007, 10.1016/s1352-2310(03)00256-5, 2003.
- Yao, X. H., Ling, T. Y., Fang, M., and Chan, C. K.: Comparison of thermodynamic predictions for in situ pH in PM<sub>2.5</sub>, *Atmospheric Environment*, 40, 2835-2844, 10.1016/j.atmosenv.2006.01.006, 2006.
- Yu, J. Z., Huang, X. F., Xu, J. H., and Hu, M.: When aerosol sulfate goes up, so does oxalate: Implication for the formation mechanisms of oxalate, *Environmental Science & Technology*, 39, 128-133, 10.1021/Es049559f, 2005.
- Yu, L., Smith, J., Laskin, A., Anastasio, C., Laskin, J., and Zhang, Q.: Chemical characterization of SOA formed from aqueous-phase reactions of phenols with the triplet excited state of carbonyl and hydroxyl radical, *Atmospheric Chemistry and Physics*, 14, 13801-13816, 10.5194/acp-14-13801-2014, 2014.
- Zhou, Y., Huang, X. H., Bian, Q., Griffith, S. M., Louie, P. K., and Yu, J. Z.: Sources and atmospheric processes impacting oxalate at a suburban coastal site in Hong Kong: Insights inferred from 1 year hourly measurements, *Journal of Geophysical Research: Atmospheres*, 120, 9772-9788, 2015.
